# Supplementary material
Source: Elsevier journal article supplement (https://www.sciencedirect.com/science/article/pii/S0009739X1830335X)
Supplement: mmc1 [file S0009739X1830335X:mmc1.docx]

**Anexo.**

**Cuestionario específico:**

Visita preoperatoria:

Edad: / Sexo:

Antecedentes patológicos:

Diagnóstico:

Tratamientos previos:

Grado de impacto de la HH / RF a nivel social y laboral:

Quirófano:

Fecha de la cirugía:

Incidencias / complicaciones:

CMA (a rellenar por enfermería):

Dolor postoperatorio (EVA 0-10):

Incidencias / complicaciones:

Fecha y hora de alta:

Control postoperatorio (7-10 días):

Fecha:

Grado de satisfacción con el resultado de la cirugía (EVA 0-10):

9-10: Muy satisfecho

6-8: Satisfecho

3-5: Insatisfecho

0-2: Muy insatisfecho

Suduración compensatoria (¿ha experimentado sudoración excesiva anormal en otras partes del cuerpo tras la cirugía?): sí / no.

Si “sí” cómo la catalogaría:

Moderada (localizada, sin interferir con las actividades de la vida diaria).

Severa (sistémica, afectando de manera tolerable la vida diaria)

Intolerable (sistémica, afectando significativamente la vida diaria).

Control postoperatorio telefónico (12 meses):

Fecha:

Grado de satisfacción con el resultado de la cirugía (EVA 0-10):

9-10: Muy satisfecho

6-8: Satisfecho

3-5: Insatisfecho

0-2: Muy insatisfecho

Suduración compensatoria (¿ha experimentado sudoración excesiva anormal en otras partes del cuerpo tras la cirugía?): sí / no.

Si “sí” cómo la catalogaría:

Moderada (localizada, sin interferir con las actividades de la vida diaria).

Severa (sistémica, afectando de manera tolerable la vida diaria)

Intolerable (sistémica, afectando significativamente la vida diaria).
